# Supplementary material for: Prolonged transfer of feces from the lean mice modulates gut microbiota in obese mice
Source: PubMed Central journal article supplement (PMC4995824; doi:10.1186/s12986-016-0116-8), 2016-08-23

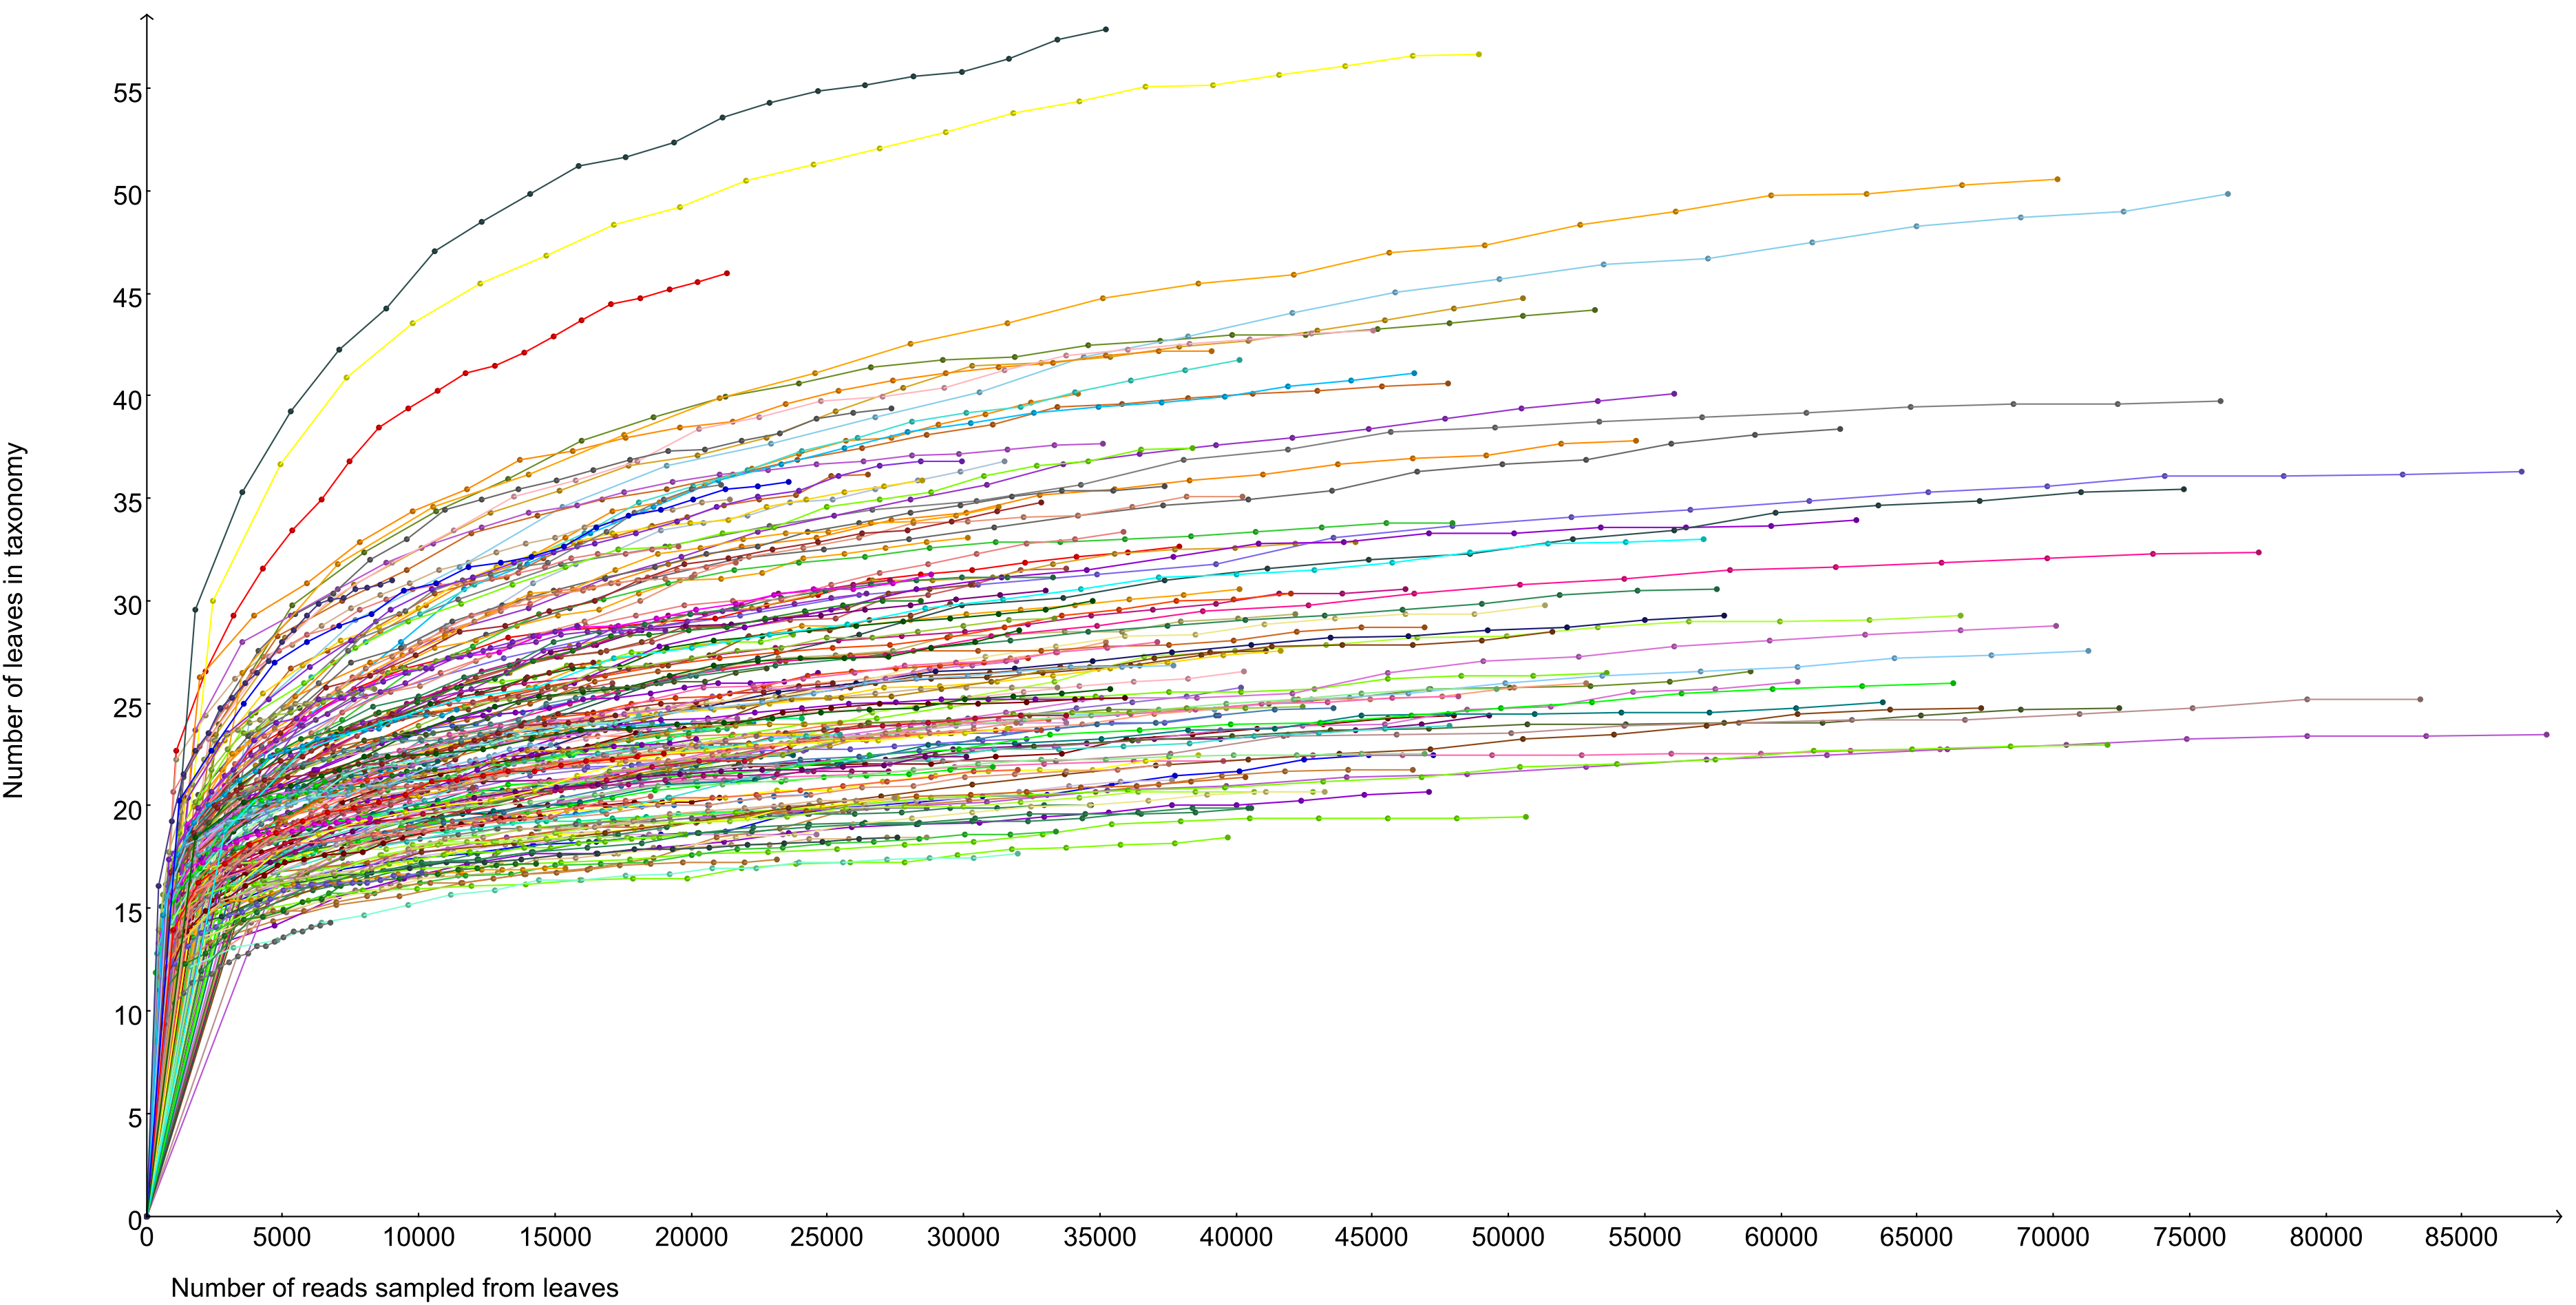

Supplement: 12986_2016_116_MOESM2_ESM.pdf [file 12986_2016_116_MOESM2_ESM.pdf]
